# Supplementary material for: Anion-triggered melamine based self-assembly and hydrogel
Source: Royal Society of Chemistry journal article supplement (doi:10.1039/c0cc02030c), 2010-01-01
Supplement: c0cc02030c.pdf [file c0cc02030c.pdf]

## **Anion-triggered melamine based self-assembly and hydrogel**

Jiang-Shan Shen,<sup>a</sup> Qing-Guo Cai,<sup>b</sup> Yun-Bao Jiang,<sup>b</sup> Hong-Wu Zhang\*<sup>a</sup>

<sup>a</sup> *Institute of Urban Environment, Chinese Academy of Sciences, Xiamen 361021, China*

<sup>b</sup> *Department of Chemistry, College of Chemistry and Chemical Engineering, and the MOE Key Laboratory of Analytical Sciences, Xiamen University, Xiamen 361005, China*

*Fax: (+86)592-619-0773; Tel: (+86)592-619-0773; E-mail: hwzhang@iue.ac.cn*

### **Supporting Information**

## Chemicals and characterizations

All chemicals commercially available at AR grade were used as received.

Infrared (IR) spectra were conducted on Nicolet AVATAR FT-IR360 spectrophotometer. X-Ray powder diffractions (XRD) were performed on Panalytical X'pert PRO diffractometer equipped with Cu K $\alpha$  radiation ( $\lambda = 1.5418 \text{ \AA}$ ) at room temperature. Field emission scanning electron microscopy (FESEM) experiments were carried out on HITACHI S-4800 working at an accelerating voltage of 20 kV. Transmission electron microscopy (TEM) experiments were performed on HITACHI H-7650 system. Elemental analysis data were obtained on Vario EL III analyzer. For XRD, IR, and elemental analysis characterization, samples were prepared by freeze-drying the original hydrogels under vacuum at  $-80 \text{ }^\circ\text{C}$ , the corresponding xerogels were then washed several times by water to remove free ions and melamine and then dried in vacuum at room temperature.

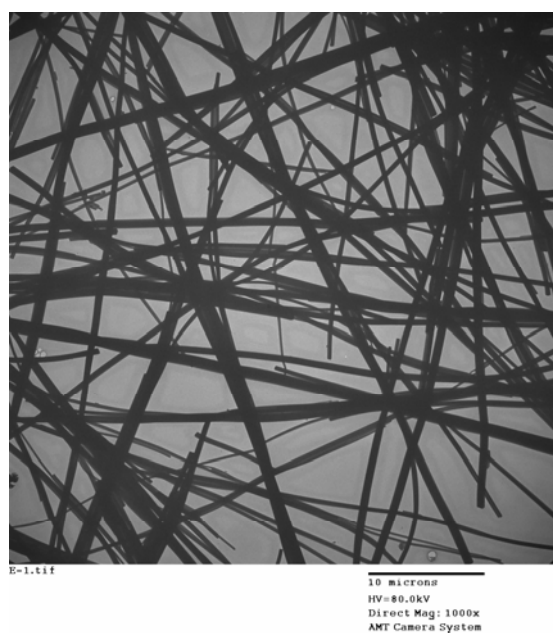

**Fig. S1** TEM image of melamine (M) xerogel from the corresponding original hydrogel of protonated M triggered by  $\text{PO}_4^{3-}$ . The scale bar is  $10\ \mu\text{m}$ .

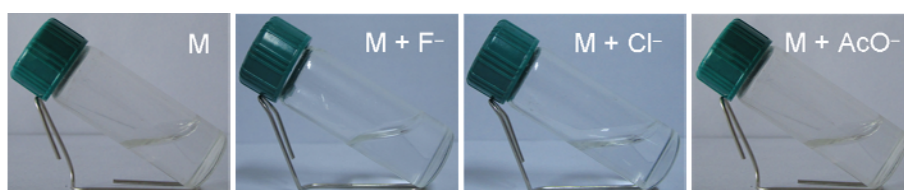

**Fig. S2** No gelation of protonated melamine (M) could be observed in the presence of  $\text{F}^-$ ,  $\text{Cl}^-$ , and  $\text{AcO}^-$ , respectively. The molar ratio of anion to M was 6:1 and the total concentration was 700 mM, and pH was 2-5.

**Table S1.** Experimental conditions and observations of melamine (M)-anion systems

| Anions                        | [anion] / mM | [M] / mM | [anion] / [M] | pH     | observation |
|-------------------------------|--------------|----------|---------------|--------|-------------|
| F <sup>-</sup>                | 600          | 100      | 6 : 1         | ca.2-5 | Sol         |
| Cl <sup>-</sup>               | 600          | 100      | 6 : 1         | ca.2-5 | Sol         |
| NO <sub>3</sub> <sup>-</sup>  | 300          | 50       | 6 : 1         | ca.2-5 | Gel         |
| PO <sub>4</sub> <sup>3-</sup> | 600          | 100      | 6 : 1         | ca.2-5 | Gel         |
| SO <sub>4</sub> <sup>2-</sup> | 450          | 75       | 6 : 1         | 5      | Gel         |
| ATP                           | 100          | 100      | 1 : 1         | ca.2-5 | Gel         |
| AcO <sup>-</sup>              | 600          | 100      | 6 : 1         | ca.2-5 | Sol         |

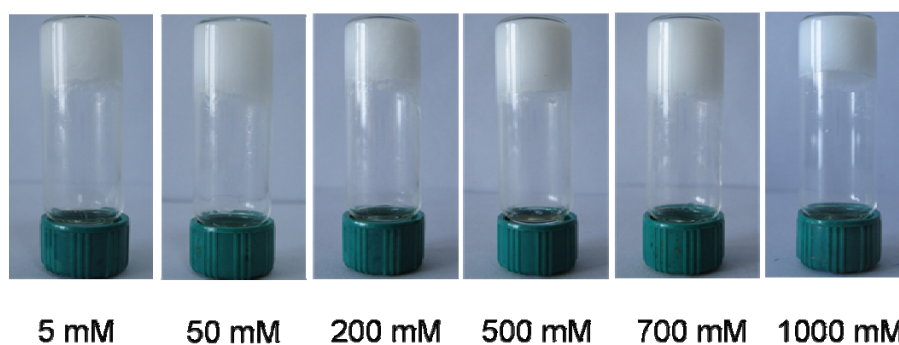

**Fig. S3** Ionic strength effect on the hydrogelation of protonated melamine (M) triggered by NO<sub>3</sub><sup>-</sup>. NaCl concentration varied from 5 to 1000 mM. The molar ratio of NO<sub>3</sub><sup>-</sup> to M was 6:1 and the total concentration of M-NO<sub>3</sub><sup>-</sup> was 700 mM. pH was 2-5.

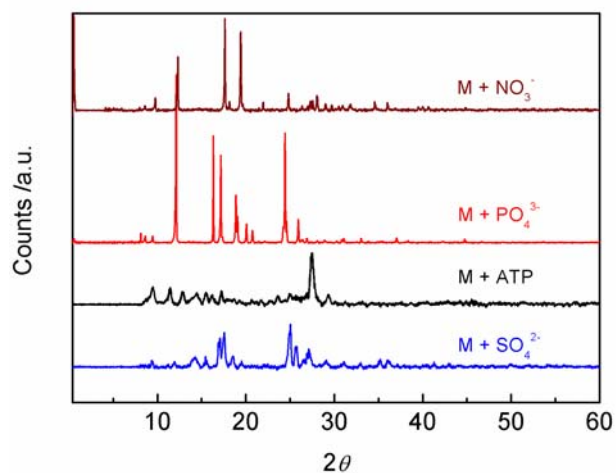

**Fig. S4** X-ray diffraction patterns of the xerogels from the corresponding original hydrogels of protonated melamine (M) triggered by NO<sub>3</sub><sup>-</sup>, PO<sub>4</sub><sup>3-</sup>, SO<sub>4</sub><sup>2-</sup>, and ATP, respectively.

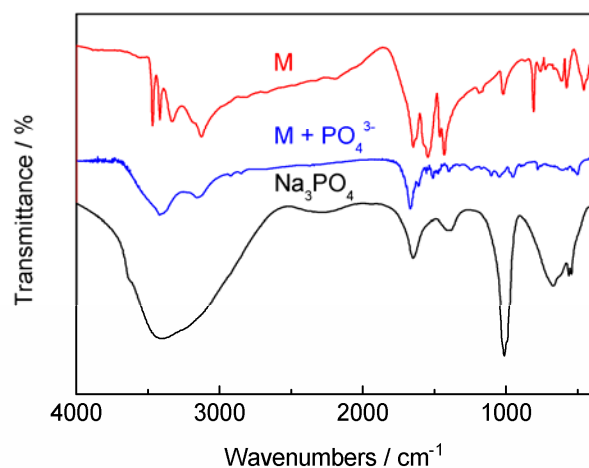

**Fig. S5** IR spectra in KBr pellet of melamine (M), Na<sub>3</sub>PO<sub>4</sub>, and M(H<sup>+</sup>)<sub>m</sub>-PO<sub>4</sub><sup>3-</sup> xerogel from the corresponding original hydrogel of protonated melamine triggered by PO<sub>4</sub><sup>3-</sup>

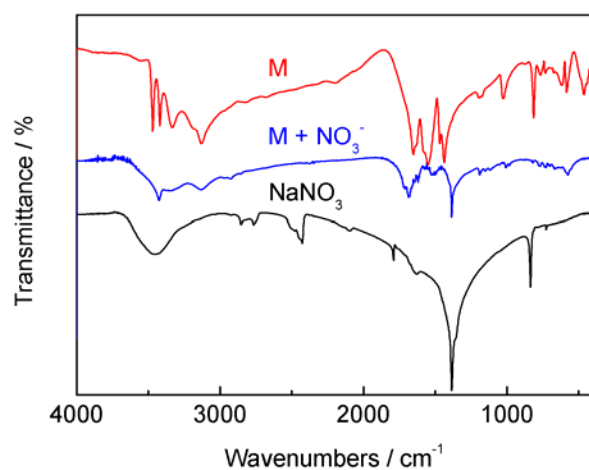

**Fig. S6** IR spectra in KBr pellet of melamine (M), NaNO<sub>3</sub>, and M(H<sup>+</sup>)<sub>m</sub>-NO<sub>3</sub><sup>-</sup> xerogel from the corresponding original hydrogel of protonated melamine triggered by NO<sub>3</sub><sup>-</sup>

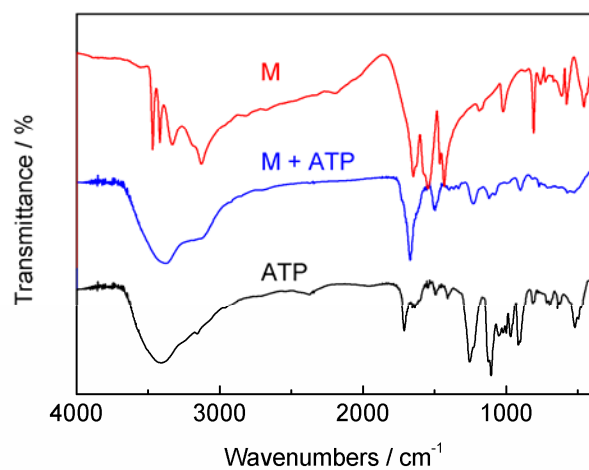

**Fig. S7** IR spectra in KBr pellet of melamine (M), ATP, and M(H<sup>+</sup>)<sub>m</sub>-ATP xerogel from the corresponding original hydrogel of protonated melamine triggered by ATP

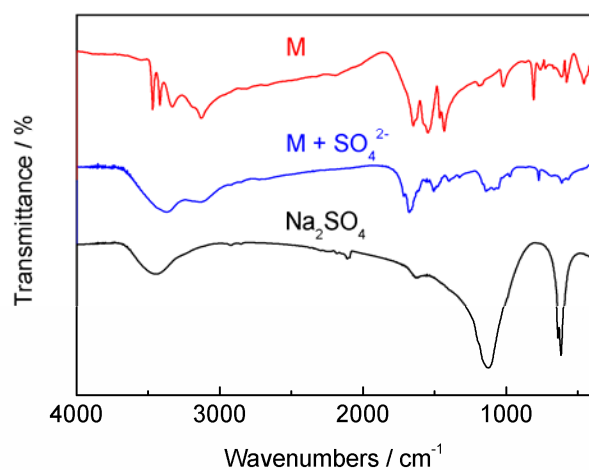

**Fig. S8** IR spectra in KBr pellet of melamine (M), Na<sub>2</sub>SO<sub>4</sub>, and M(H<sup>+</sup>)<sub>m</sub>-SO<sub>4</sub><sup>2-</sup> xerogel from the corresponding original hydrogel of protonated melamine triggered by SO<sub>4</sub><sup>2-</sup>

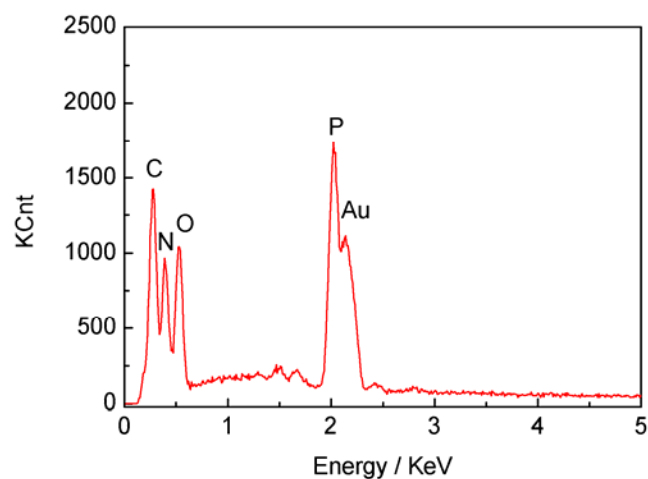

**Fig. S9** EDX spectrum of M(H<sup>+</sup>)<sub>m</sub>-PO<sub>4</sub><sup>3-</sup> xerogel from the corresponding original hydrogel of protonated melamine triggered by PO<sub>4</sub><sup>3-</sup>

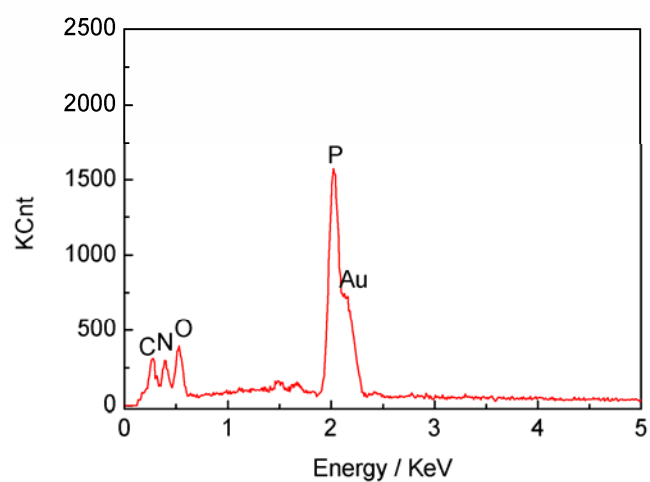

**Fig. S10** EDX spectrum of  $M(H^+)_m$ -ATP xerogel from the corresponding original hydrogel of protonated melamine triggered by ATP

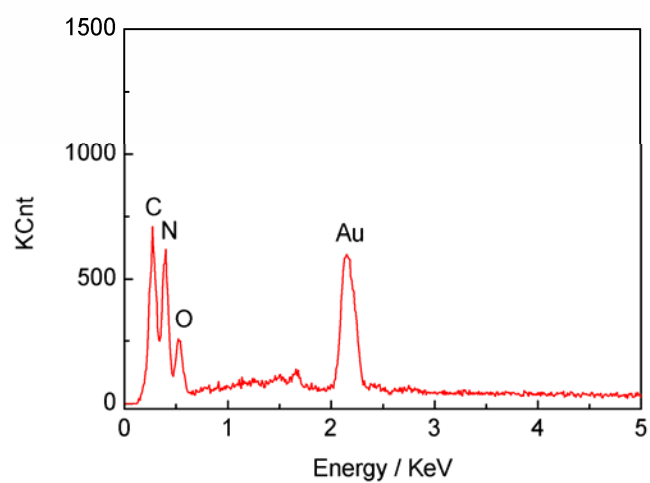

**Fig. S11** EDX spectrum of  $M(H^+)_m$ - $NO_3^-$  xerogel from the corresponding original hydrogel of protonated melamine triggered by  $NO_3^-$



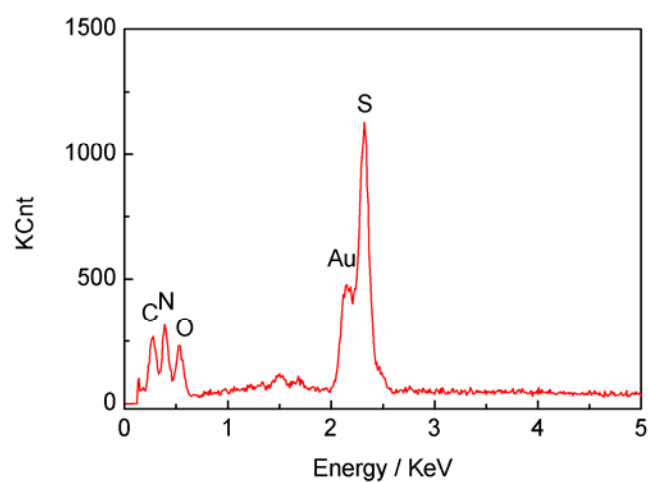

**Fig. S12** EDX spectrum of  $M(H^+)_m-SO_4^{2-}$  xerogel from the corresponding original hydrogel of protonated melamine triggered by  $SO_4^{2-}$

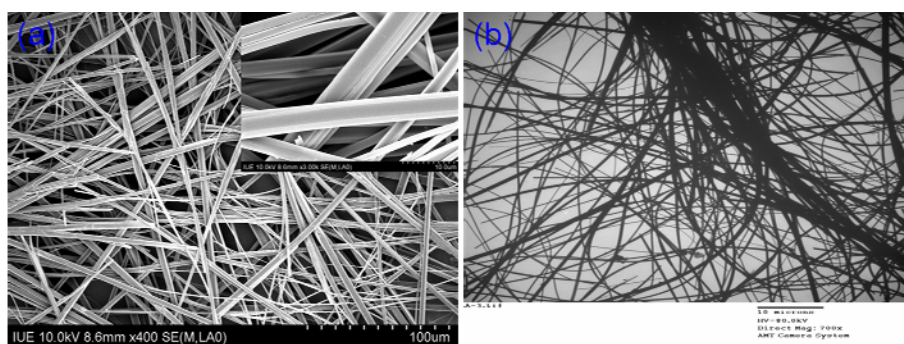

**Fig. S13** FESEM (a) and TEM (b) images of melamine -  $NO_3^-$  sol system. Molar ratio of melamine to  $NO_3^-$  was 1:1 and total concentration was 50 mM. pH was 2-5. The scale bars for (a) and (b) are 100  $\mu m$  and 10  $\mu m$ , respectively. The scale bar for inset in (a) is 10  $\mu m$ .

**Table S2.** Elemental analysis data of protonated  $M(H^+)_m-XO_y^{n-}$  xerogels

| Sample name                     | Weight <sup>a</sup> / [mg] | Content / [%]                | $n_M : n_{XO_y^{n-}}$ |
|---------------------------------|----------------------------|------------------------------|-----------------------|
| M-NO <sub>3</sub> <sup>-</sup>  | 1.5680                     | N: 51.37; C: 18.74; H: 3.224 | 1:1                   |
|                                 | 2.6470                     | N: 51.22; C: 18.78; H: 3.462 | 1:1                   |
| M-PO <sub>4</sub> <sup>3-</sup> | 2.2220                     | N: 37.95; C: 16.06; H: 4.404 | 1:1                   |
|                                 | 2.4280                     | N: 37.86; C: 16.02; H: 3.808 | 1:1                   |
| M-ATP                           | 1.9630                     | N: 31.48; C: 22.60; H: 4.406 | 2:1                   |
|                                 | 1.9530                     | N: 31.21; C: 22.48; H: 4.479 | 2:1                   |
| M-SO <sub>4</sub> <sup>2-</sup> | 3.6590                     | N: 44.18; C: 18.89; H: 4.411 | 3:2                   |
|                                 | 3.5480                     | N: 44.07; C: 18.87; H: 4.842 | 3:2                   |

*a.* Every sample had two measurements.
